# Supplementary material for: OKVAR-Boost: a novel boosting algorithm to infer nonlinear dynamics and interactions in gene regulatory networks
Source: PubMed Central journal article supplement — Bioinformatics. 2013 Apr 10;29(11):1416–23. doi: 10.1093/bioinformatics/btt167 (PMC3661057; doi:10.1093/bioinformatics/btt167), 2013-04-10
Supplement: supp_btt167_okvarBoost-supp-1-revision-final.pdf [file supp_btt167_okvarBoost-supp-1-revision-final.pdf]

# OKVAR-Boost: a novel boosting algorithm to infer nonlinear dynamics and interactions in gene regulatory networks (Supplementary material)

Néhémy Lim, Yasin Şenbabaoğlu, George Michailidis and Florence d'Alché-Buc

## 1 Insights on OKVAR model: matrix-valued kernel properties

The matrix-valued function  $K$  presented in Eq. (4) is the Hadamard product of two kernels  $K_0$  and  $K_1$ , each of them satisfying the properties of a matrix-valued kernel introduced by Senkene and Tempel'man, 1973 : (1),  $\forall(\mathbf{x}, \mathbf{x}') \in \mathbb{R}^p \times \mathbb{R}^p$ ,  $K(\mathbf{x}, \mathbf{x}') = K(\mathbf{x}', \mathbf{x})^T$  and (2):  $\forall m \in \mathbb{N}$ ,  $\forall \{(\mathbf{x}_i, \mathbf{y}_i)\}_{i=1\dots m} \subseteq \mathbb{R}^p \times \mathbb{R}^p$ ,

$$\sum_{i,j=1}^m \langle K(\mathbf{x}_i, \mathbf{x}_j) \mathbf{y}_i, \mathbf{y}_j \rangle_{\mathbb{R}^p} \geq 0.$$

Due to a theorem proven in Caponnetto *et al.*, 2008, as a Hadamard product of two matrix-valued kernels, it is also a matrix-valued kernel.

## 2 Estimation of $W_m$

Empirical partial correlations<sup>1</sup>  $r_{ij}$ 's are computed for each pair of variables  $(i, j)$  conditional on all other variables from data projected on the subspace defined by  $\mathcal{S}_m$ . The  $r_{ij}$ 's can be computed from the inverse of  $\hat{\Sigma}$ , the empirical covariance matrix as follows:  $r_{ij} = \frac{-\hat{\Sigma}_{ij}^{-1}}{\sqrt{\hat{\Sigma}_{ii}^{-1} \hat{\Sigma}_{jj}^{-1}}}$ . If we assume that the variables are distributed according to a multivariate normal distribution,  $r_{ij}$  is zero if, and only if, states  $i$  and  $j$  are conditionally independent given the other variables. We carry out a statistical test based on the null hypothesis  $H_0 : r_{ij} = 0$  (no partial correlation between  $i$  and  $j$ ) vs  $H_1 : r_{ij} \neq 0$ . The test statistic is a Fisher's  $z$ -transform of the partial correlation :  $z(r_{ij}) = \frac{1}{2} \ln \left( \frac{1+r_{ij}}{1-r_{ij}} \right)$ . The null hypothesis  $H_0$  is rejected with significance level  $\alpha$  if :  $\sqrt{(N-1) - (k-2) - 3} \cdot |z(r_{ij})| > \Phi^{-1} \left( 1 - \frac{\alpha}{2} \right)$  where  $\Phi$  is the cumulative distribution function of a standard normal distribution  $\mathcal{N}(0, 1)$ . We define  $W_m$  as follows :  $w_{ij}^{(m)} = 1$  if  $H_0$  is rejected, 0 otherwise and obtain  $B_m$  as the Laplacian of  $W_m$ , e.g. as  $B_m = D_m - W_m$  where  $D_m$  is the degree matrix of  $W_m$ .

## 3 Jacobian expression for a base model $h_m$

$$\begin{aligned} J_{ij}^{(m)}(t) &= \sum_{k=0}^{N-2} \sum_{\ell=1}^p c_{k,\ell}^{(m)} \frac{\partial (K^{(m)}(\mathbf{x}_k, \mathbf{x}_t)_{i\ell})}{\partial (\mathbf{x}_t)_j} \\ &= \sum_{k=0}^{N-2} \sum_{\ell=1}^p c_{k,\ell}^{(m)} \frac{\partial}{\partial (\mathbf{x}_t)_j} \left( b_{i\ell}^{(m)} \exp(-\gamma_0 \|\mathbf{x}_k - \mathbf{x}_t\|^2) \exp(-\gamma_1 (x_{ki} - x_{t\ell})^2) \right) \\ &= \sum_{k=0}^{N-2} \sum_{\ell=1}^p b_{i\ell}^{(m)} c_{k,\ell}^{(m)} \left[ \exp(-\gamma_0 \|\mathbf{x}_k - \mathbf{x}_t\|^2) \frac{\partial}{\partial (\mathbf{x}_t)_j} \left( \exp(-\gamma_1 (x_{ki} - x_{t\ell})^2) \right) \right. \\ &\quad \left. + \exp(-\gamma_1 (x_{ki} - x_{t\ell})^2) \frac{\partial}{\partial (\mathbf{x}_t)_j} \left( \exp(-\gamma_0 \|\mathbf{x}_k - \mathbf{x}_t\|^2) \right) \right] \end{aligned}$$

Finally, we get the expression for the instantaneous Jacobian of  $h_m$ :

---

<sup>1</sup>We omit the index  $m$  for the sake of clarity

$$\begin{aligned}
J_{ij}^{(m)}(t) &= 2b_{ij}^{(m)}\gamma_1 \sum_{k=0}^{N-2} c_{k,j}^{(m)} \exp(-\gamma_0 \|\mathbf{x}_k - \mathbf{x}_t\|^2) (x_{ki} - x_{tj}) \exp(-\gamma_1 (x_{ki} - x_{tj})^2) \\
&\quad + 2\gamma_0 \sum_{k=0}^{N-2} \sum_{\ell=1}^p c_{k,\ell}^{(m)} b_{i\ell}^{(m)} (x_{kj} - x_{tj}) \exp(-\gamma_1 (x_{ki} - x_{t\ell})^2) \exp(-\gamma_0 \|\mathbf{x}_k - \mathbf{x}_t\|^2)
\end{aligned}$$

Note that when  $\gamma_0$  is close to 0,  $K^{(m)}(\mathbf{x}_k, \mathbf{x}_t)_{ij} \approx b_{ij}^{(m)} \exp(-\gamma_1 (x_{ki} - x_{tj})^2)$  and the Jacobian coefficient  $J_{ij}^{(m)}(t) \approx 2b_{ij}^{(m)}\gamma_1 \sum_k c_{k,j}^{(m)} (x_{ki} - x_{tj}) \exp(-\gamma_1 (x_{ki} - x_{tj})^2)$ , meaning that the value  $b_{ij}$  is central to impose the zero's to the model. The average Jacobian of  $h_m$  writes as follows:

$$J_{ij}^{(m)} = \frac{1}{N-1} \sum_{t=0}^{N-2} J_{ij}^{(m)}(t)$$

## 4 Block-instability criterion for model selection

The BIS criterion is defined from a given time series and for a choice of  $\lambda_1$  and  $\lambda_2$ . It measures the empirical mean of the difference using the Frobenius norm between the Jacobian matrices  $J(H_{b,1})$  and  $J(H_{b,2})$  computed from a pair of models  $(H_{b,1}, H_{b,2})$  built from the  $b^{th}$  pair of block-bootstrapped subsamples.

$$BIS(\lambda_1, \lambda_2; \mathbf{x}_0^{N-1}) = \frac{1}{B} \sum_{b=1}^B \|J(H_{b,1}) - J(H_{b,2})\|^2 \quad (1)$$

where  $H_{b,1}$  (resp.  $H_{b,2}$ ) is the autoregressive model built from the block sample  $(b, 1)$  (resp.  $(b, 2)$ ) drawn from a single time series  $\mathbf{x}_0, \dots, \mathbf{x}_{N-1}$ .

## 5 Tables

Table S1: Average-degree, density, and modularity for DREAM3 networks.

| Size10         | Ecoli1    | Ecoli2    | Yeast1    | Yeast2    | Yeast3     |
|----------------|-----------|-----------|-----------|-----------|------------|
| Average degree | 2.2       | 3.0       | 2.0       | 5.0       | 4.4        |
| Density        | 0.244     | 0.333     | 0.222     | 0.556     | 0.489      |
| Modularity     | 0.016 (2) | 0 (1)     | 0.260 (3) | 0 (1)     | 0 (1)      |
| Size100        | Ecoli1    | Ecoli2    | Yeast1    | Yeast2    | Yeast3     |
| Average degree | 2.5       | 2.38      | 3.32      | 7.78      | 11.02      |
| Density        | 0.025     | 0.024     | 0.033     | 0.079     | 0.111      |
| Modularity     | 0.643 (6) | 0.661 (7) | 0.681 (8) | 0.328 (6) | 0.088 (14) |

The total degree of a node (gene) is the sum of its in- and out-degrees, while the average across genes gives the **average-degree** for the entire network. The **density** of a network is the ratio of the number of edges in the network to the maximum possible number of edges. The calculated *modularity* index corresponds to the optimal number of modules for that network (numbers given in parentheses).

Table S2: AUROC and AUPR for OKVAR-Boost, run on size-10 Ecoli1 network. Average  $\pm$  Standard Deviation values are computed on using combinations of 1 up to 4 time series.

| Number of time series | 1                    | 2                    | 3                    | 4     |
|-----------------------|----------------------|----------------------|----------------------|-------|
| AUROC                 | 0.665<br>$\pm 0.088$ | 0.696<br>$\pm 0.101$ | 0.715<br>$\pm 0.041$ | 0.853 |
| AUPR                  | 0.272<br>$\pm 0.081$ | 0.273<br>$\pm 0.137$ | 0.270<br>$\pm 0.092$ | 0.583 |

Table S3: AUROC and AUPR for OKVAR-Boost ( $\lambda_1 = 0.01, \lambda_2 = 0.1$  selected by *Block-Stability*), LASSO and Äijö's algorithm run on the IRMA network. All the results are obtained using either the four switch-off time series or the five switch-on time series. The numbers in **boldface** are the maximum values for each column.

|             | Switch-off   |              | Switch-on |          |
|-------------|--------------|--------------|-----------|----------|
|             | AUROC        | AUPR         | AUROC     | AUPR     |
| OKVAR-Boost | 0.807        | 0.807        | <b>1</b>  | <b>1</b> |
| LASSO       | 0.500        | 0.253        | 0.583     | 0.474    |
| Äijö        | <b>0.875</b> | <b>0.848</b> | 0.838     | 0.836    |

## 6 Figures

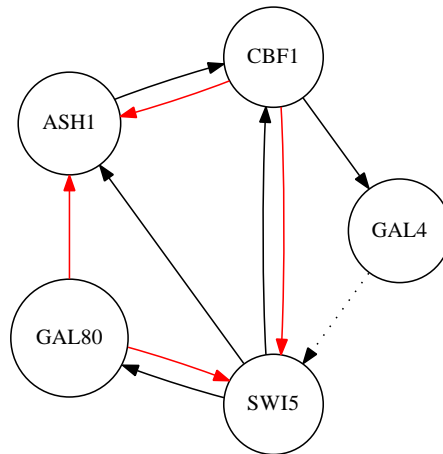

Figure S1: Inferred IRMA network from OKVAR-Boost algorithm using switch-off time series ( $\lambda_1 = 0.01, \lambda_2 = 0.1$ ). Solid, dotted and red lines correspond respectively to correct, missing and false edges.

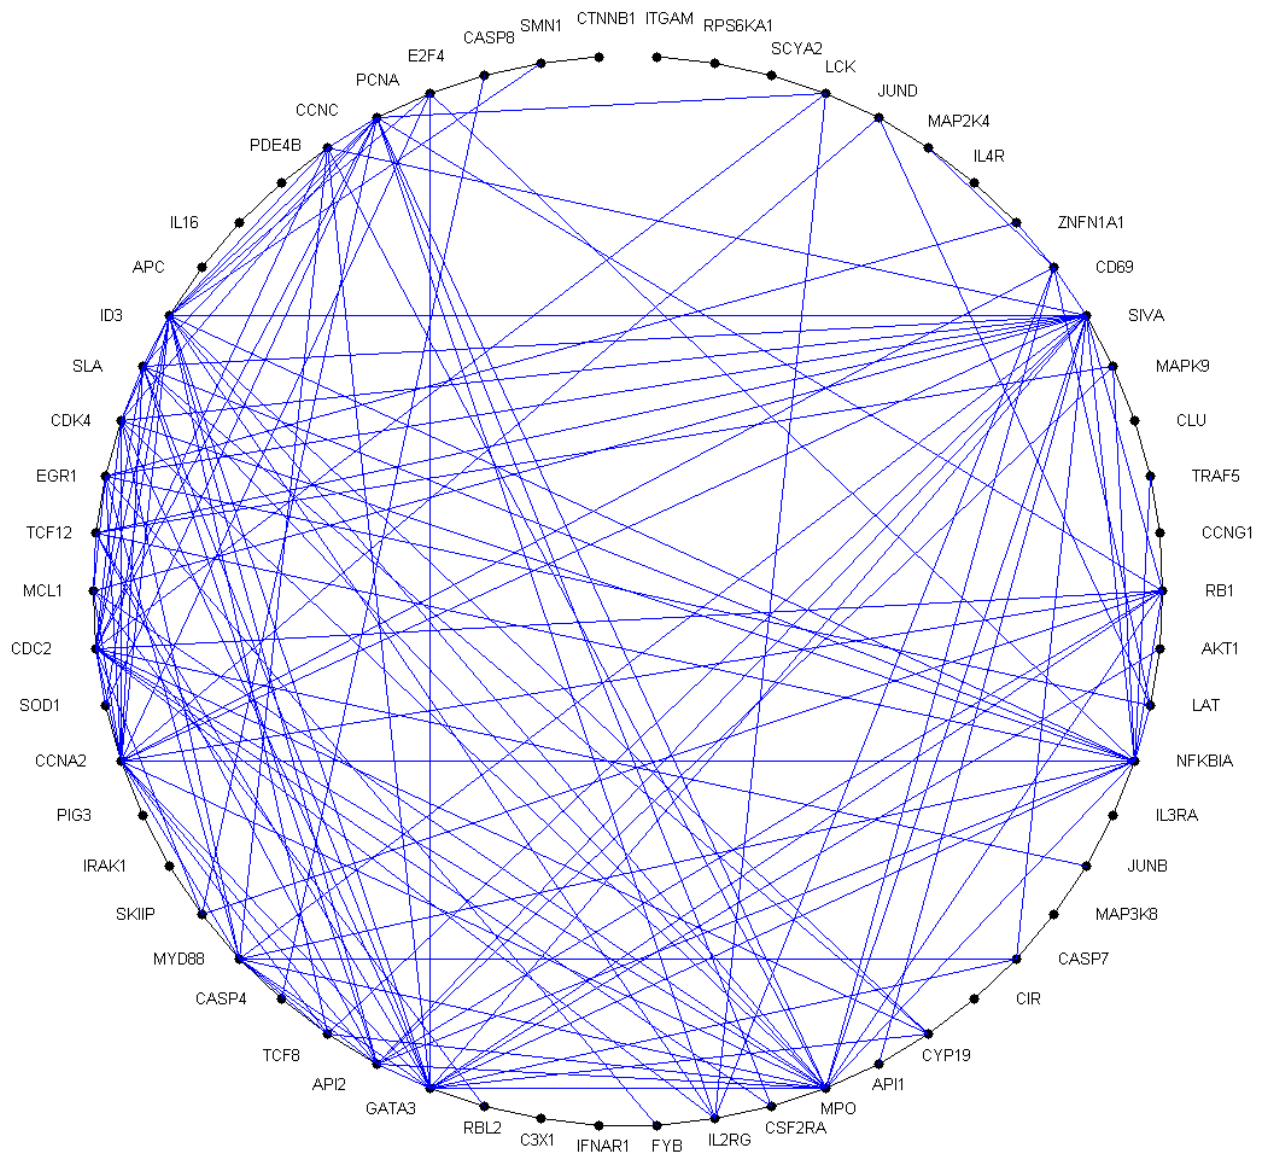

Figure S2: Reconstructed T-cell activation regulatory network using OKVAR-Boost ( $\lambda_1 = \lambda_2 = 1$ , consensus threshold= 0.01).
